# Supplementary material for: Wearable Cardioverter–Defibrillator-Measured Step Count for the Surveillance of Physical Fitness during Cardiac Rehabilitation
Source: MDPI journal article supplement (doi:10.3390/s21217054), 2021-10-25
Supplement: s1 [file s1]

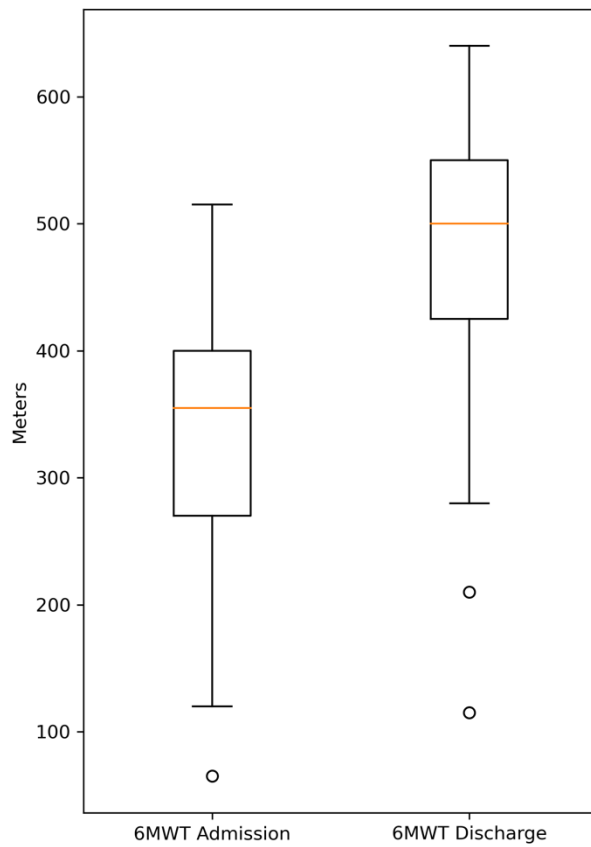

Figure S1: 6MWT at Admission and Discharge. Admission and discharge levels are from the cardiopulmonary rehabilitation clinic stays.
